# Supplementary material
Source: HighWire-hosted journal article supplement (https://bmjopen.bmj.com/content/12/5/e058466)
Supplement: inline-supplementary-material-1 [file inline-supplementary-material-1.pdf]

## Supplementary appendix

How many of persistent coughers have pulmonary tuberculosis? A population-based cohort study in Ethiopia

Abiot Bezabeh Banti<sup>1,2</sup>, Daniel Gemechu Datiko<sup>3</sup>, Sven Gudmund Hinderaker<sup>2</sup>, Einar Haldal<sup>4</sup>, Mesay Hailu Dangiso<sup>6</sup>, Gebeyehu Assefa Mitiku<sup>7</sup>, Richard Aubrey White<sup>4</sup> and Brita Askeland Winje<sup>4,5\*</sup>

File S1 Strobe checklist

File S2 Adult symptom screening questionnaire

File S3 Statistical method

Table S1 Risk factors for all-type pulmonary tuberculosis in Dale, Ethiopia, 2016–2017

Table S2 Comparison of current versus previous study in six kebeles included in the current study 5-years earlier.

## File S1 Strobe checklist

STROBE Statement—Checklist of items that should be included in reports of *cohort studies*

|                           | Item No | Recommendation                                                                                                                                                                                               |       |
|---------------------------|---------|--------------------------------------------------------------------------------------------------------------------------------------------------------------------------------------------------------------|-------|
| <b>Title and abstract</b> | 1       | (a) Indicate the study's design with a commonly used term in the title or the abstract                                                                                                                       | 1     |
|                           |         | (b) Provide in the abstract an informative and balanced summary of what was done and what was found                                                                                                          | 2     |
| <b>Introduction</b>       |         |                                                                                                                                                                                                              |       |
| Background/rationale      | 2       | Explain the scientific background and rationale for the investigation being reported                                                                                                                         | 4     |
| Objectives                | 3       | State specific objectives, including any prespecified hypotheses                                                                                                                                             | 4     |
| <b>Methods</b>            |         |                                                                                                                                                                                                              |       |
| Study design              | 4       | Present key elements of study design early in the paper                                                                                                                                                      | 5     |
| Setting                   | 5       | Describe the setting, locations, and relevant dates, including periods of recruitment, exposure, follow-up, and data collection                                                                              | 5     |
| Participants              | 6       | (a) Give the eligibility criteria, and the sources and methods of selection of participants. Describe methods of follow-up                                                                                   | 6     |
|                           |         | (b) For matched studies, give matching criteria and number of exposed and unexposed                                                                                                                          | na    |
| Variables                 | 7       | Clearly define all outcomes, exposures, predictors, potential confounders, and effect modifiers. Give diagnostic criteria, if applicable                                                                     | 7     |
| Data sources/measurement  | 8*      | For each variable of interest, give sources of data and details of methods of assessment (measurement). Describe comparability of assessment methods if there is more than one group                         | 7     |
| Bias                      | 9       | Describe any efforts to address potential sources of bias                                                                                                                                                    | 8     |
| Study size                | 10      | Explain how the study size was arrived at                                                                                                                                                                    | 6     |
| Quantitative variables    | 11      | Explain how quantitative variables were handled in the analyses. If applicable, describe which groupings were chosen and why                                                                                 | 7     |
| Statistical methods       | 12      | (a) Describe all statistical methods, including those used to control for confounding                                                                                                                        | 7     |
|                           |         | (b) Describe any methods used to examine subgroups and interactions                                                                                                                                          | 7     |
|                           |         | (c) Explain how missing data were addressed                                                                                                                                                                  | 7     |
|                           |         | (d) If applicable, explain how loss to follow-up was addressed                                                                                                                                               |       |
|                           |         | (e) Describe any sensitivity analyses                                                                                                                                                                        |       |
| <b>Results</b>            |         |                                                                                                                                                                                                              |       |
| Participants              | 13*     | (a) Report numbers of individuals at each stage of study—eg numbers potentially eligible, examined for eligibility, confirmed eligible, included in the study, completing follow-up, and analysed            | 8     |
|                           |         | (b) Give reasons for non-participation at each stage                                                                                                                                                         | 8     |
|                           |         | (c) Consider use of a flow diagram                                                                                                                                                                           |       |
| Descriptive data          | 14*     | (a) Give characteristics of study participants (eg demographic, clinical, social) and information on exposures and potential confounders                                                                     | 8     |
|                           |         | (b) Indicate number of participants with missing data for each variable of interest                                                                                                                          | 10/13 |
|                           |         | (c) Summarise follow-up time (eg, average and total amount)                                                                                                                                                  | 8     |
| Outcome data              | 15*     | Report numbers of outcome events or summary measures over time                                                                                                                                               | 8     |
| Main results              | 16      | (a) Give unadjusted estimates and, if applicable, confounder-adjusted estimates and their precision (eg, 95% confidence interval). Make clear which confounders were adjusted for and why they were included | 10/13 |

|                          |    |                                                                                                                                                                            |         |
|--------------------------|----|----------------------------------------------------------------------------------------------------------------------------------------------------------------------------|---------|
|                          |    | (b) Report category boundaries when continuous variables were categorized                                                                                                  | 10/13   |
|                          |    | (c) If relevant, consider translating estimates of relative risk into absolute risk for a meaningful time period                                                           | 8/9     |
| Other analyses           | 17 | Report other analyses done—eg analyses of subgroups and interactions, and sensitivity analyses                                                                             | 8/Suppl |
| <b>Discussion</b>        |    |                                                                                                                                                                            |         |
| Key results              | 18 | Summarise key results with reference to study objectives                                                                                                                   | 14      |
| Limitations              | 19 | Discuss limitations of the study, taking into account sources of potential bias or imprecision. Discuss both direction and magnitude of any potential bias                 | 3+14    |
| Interpretation           | 20 | Give a cautious overall interpretation of results considering objectives, limitations, multiplicity of analyses, results from similar studies, and other relevant evidence | 14-17   |
| Generalisability         | 21 | Discuss the generalisability (external validity) of the study results                                                                                                      | 17      |
| <b>Other information</b> |    |                                                                                                                                                                            |         |
| Funding                  | 22 | Give the source of funding and the role of the funders for the present study and, if applicable, for the original study on which the present article is based              | 18      |

\*Give information separately for exposed and unexposed groups.

**Note:** An Explanation and Elaboration article discusses each checklist item and gives methodological background and published examples of transparent reporting. The STROBE checklist is best used in conjunction with this article (freely available on the Web sites of PLoS Medicine at <http://www.plosmedicine.org/>, Annals of Internal Medicine at <http://www.annals.org/>, and Epidemiology at <http://www.epidem.com/>). Information on the STROBE Initiative is available at <http://www.strobe-statement.org>.

## File S2. Adult symptom screening questionnaire

**APPENDIX 2: Adult – tuberculosis symptom based questionnaire – Sidama cluster-study**Questionnaire n°.  Name of interviewer \_\_\_\_\_Date . - (dd.mm.yy)**1. Socio-demographic variables**1.1 Name \_\_\_\_\_ 1.2. Age: , -1.3. Gender (male=1, female=2)  1.4. Cellphone. 

1.5. Address: Woreda \_\_\_\_\_ Kebele \_\_\_\_\_ Village \_\_\_\_\_

1.6. Marital status: (single=1, married=2, divorced=3, widowed=4, other=9) 

If other, specify: \_\_\_\_\_

1.7. Total number of people in the household: Among them, number of children < 5 years of age: Their age(s): , , , , 1.8. Highest grade completed education: ,No schooling (yes=1, no=0. other=9) 

If other, specify \_\_\_\_\_

1.9. Occupation:

(farmer=1, housewife= 2, merchant=3, student=4, government employee=5, daily

labourer=6, other=9) 

If other,(specify) \_\_\_\_\_

**2. Socio-economic variables**2.1. Number of rooms in the house: 2.2. Wall type: (wood with mud/cement or brick=1, wood only=2, other=9) 

If other, specify \_\_\_\_\_

2.3. Roof type: (corrugated iron sheet=1, thatched/leaf=2, other=9) 

If other, specify: \_\_\_\_\_

2.4. Type of fuel for cooking

(electricity=1, kerosene=2, charcoal=3, wood=4, cow dung=5, agriculture by-product=6,

no cooking in the household=7, other=9): 

If other, specify: \_\_\_\_\_

Appendix 2: ENGLISH

Last updated: 250315

**APPENDIX 2: Adult – tuberculosis symptom based questionnaire – Sidama cluster-study**2.5. Light source: Electricity (yes=1, no=0, other=9): 

If Other, specify: \_\_\_\_\_

2.6. Variables for household wealth index (present=1, absent=0, unknown=9)

| Household                               | Present | Absent | Unknown |
|-----------------------------------------|---------|--------|---------|
| 2.6.1 Separate kitchen in the household |         |        |         |
| 2.6.2 Cooking room ventilation          |         |        |         |
| 2.6.3 Heating in the house              |         |        |         |
| 2.6.4 Radio                             |         |        |         |
| 2.6.5 Television                        |         |        |         |
| 2.6.6 Mobile phone                      |         |        |         |
| 2.6.7 Refrigerator                      |         |        |         |
| 2.6.8 Land for agriculture              |         |        |         |
| 2.6.9 Bank account                      |         |        |         |

**3. Symptoms of tuberculosis (yes=1, no=0)**

| Symptoms                                                                                                                                                                                                                                                                                                                                                                                                                                                                                   | Yes | No | Comment (i.e. duration in weeks, dates. enter NK if not known) |
|--------------------------------------------------------------------------------------------------------------------------------------------------------------------------------------------------------------------------------------------------------------------------------------------------------------------------------------------------------------------------------------------------------------------------------------------------------------------------------------------|-----|----|----------------------------------------------------------------|
| 3.1. How long have you been coughing?                                                                                                                                                                                                                                                                                                                                                                                                                                                      |     |    |                                                                |
| 3.2. Is this cough productive of sputum?                                                                                                                                                                                                                                                                                                                                                                                                                                                   |     |    |                                                                |
| 3.3. Does the sputum contain blood?                                                                                                                                                                                                                                                                                                                                                                                                                                                        |     |    |                                                                |
| 3.4. Do you have fever?                                                                                                                                                                                                                                                                                                                                                                                                                                                                    |     |    |                                                                |
| 3.5. Do you have night sweats?                                                                                                                                                                                                                                                                                                                                                                                                                                                             |     |    |                                                                |
| 3.6. Have you lost your appetite?                                                                                                                                                                                                                                                                                                                                                                                                                                                          |     |    |                                                                |
| 3.7. Have you lost weight?                                                                                                                                                                                                                                                                                                                                                                                                                                                                 |     |    |                                                                |
| 3.8. Do you have chest pain or difficulty of breathing?                                                                                                                                                                                                                                                                                                                                                                                                                                    |     |    |                                                                |
| 3.9. Did you visit a health facility for your current illness?                                                                                                                                                                                                                                                                                                                                                                                                                             |     |    |                                                                |
| 3.10. If no in 3.9, reasons for not seeking health care (enter 1 in any applicable):<br><br>Not knowing that it could be TB <input type="checkbox"/> , not knowing where to go for care <input type="checkbox"/> , distance to health facility <input type="checkbox"/> , having to take transport <input type="checkbox"/> , getting permission to go for care <input type="checkbox"/><br>costs <input type="checkbox"/> , other <input type="checkbox"/><br><br>If other specify: _____ |     |    |                                                                |

**APPENDIX 2: Adult – tuberculosis symptom based questionnaire – Sidama cluster-study****4. Contact-history and risk-factors (yes=1, no=0)**

| Contact-history and risk-factors                         | Yes | No | Comment (i.e. duration in weeks, dates. enter NK if not known) |
|----------------------------------------------------------|-----|----|----------------------------------------------------------------|
| 4.1. Were you treated for tuberculosis before?           |     |    |                                                                |
| 4.2. Any TB case in the household in the past 5 years    |     |    |                                                                |
| 4.3. Did you live with a person who has a chronic cough? |     |    |                                                                |
| 4.4. Were you tested for HIV in the past year            |     |    |                                                                |
| 4.5. Ever alcohol-drinker                                |     |    |                                                                |
| 4.6. Ever chewed Khat                                    |     |    |                                                                |
| 4.7. Ever smoker                                         |     |    |                                                                |
| 4.8. Smoker currently in the household                   |     |    |                                                                |
| 4.9. Smoker previously in the household                  |     |    |                                                                |

**5. Clinical and diagnostic information**

5.1. Height (cm)  2.2. Weight (kg) ,  2.3. MUAC (cm):

5.2. BCG-scar (yes=1, no=0, unknown=9):

5.3. Sputum sample collection/s

Date of test I: .., II: .., III: ..

5.4. Date of smear result: ..,

Result (positive=1, negative=0): , if positive, grade:

5.5. Date of GeneXpert result: ..,

5.6. GeneXpert detection of *M. tb complex* (yes=1, no=0):

5.7. GeneXpert detection of rifampicin-resistance (yes=1, no=0):

5.8. Date of culture result: ..,

5.9. Detection of *M. tb complex* (yes=1, no=0):

**6. Treatment for tuberculosis disease and follow-up**

6.1. Date of registration: .. (dd.mm.yy)

6.2. Date of treatment initiation: .. (dd.mm.yy)

6.3. Treatment outcome: (cured=1, completed=2, failure=3, death=4, default=5, transfer out=6) , Other, specify: \_\_\_\_\_

**7. Contact screening**

In household with symptomatic cases, is a contact form with names and age of household contacts filled: Yes  No

Appendix 2: ENGLISH

Last updated: 250315

### File S3. Statistical method

All analyses were complete case analyses. For each exposure, a univariable Cox proportional hazards regression model was run. For continuous exposures, the HR and corresponding p-value represent an effect size of 1-unit increase in the exposure. For binary exposures, the HR and corresponding p value represent a comparison between TRUE (exposure) and FALSE (reference). For categorical exposures with 3 or more levels, the HR and corresponding p value represent a comparison between the categorical level and the baseline. There is a second p-value that tests the significance of the overall category. If this second p value is not significant, then the within-category-levels analysis should not be considered.

For each exposure group (risk factors, demographic, socio economic, clinical information, and risk behavior) we ran a multivariable Cox proportional hazards regression model containing all of the exposures in the exposure group. For continuous exposures, the HR and corresponding p value represent an effect size of 1-unit increase in the exposure. For binary exposures, the HR and corresponding p value represent a comparison between TRUE (exposure) and FALSE (reference). For categorical exposures with 3 or more levels, the HR and corresponding p value represent a comparison between the categorical level and the baseline. There is a second p value that tests the significance of the overall category. If this second p value is not significant, then the within-category-levels analysis should not be considered.

For each exposure group (risk factors, demographic, socio economic, clinical information, and risk behaviour) we ran a multivariable Cox proportional hazards Lasso (penalized) regression model containing all of the exposures in the exposure group. A lasso regression performs automated variable selection, and only reports penalized hazard ratios. The hazard ratios are interpreted in a similar manner to the other analyses. There are no confidence intervals or p-values in this analysis. If the hazard ratio is not 1, then it is considered significant.

#### *Interpretation of Lasso versus fully adjusted HR*

Lasso may have bias, but reduces variability. Multivariate regression on the other hand may have less bias, but high variability. This means that if you repeat the analyses 100 times, lasso will continue to produce similar results, whereas repeated regression analyses will produce a range of different results. The choice of method is really a trade-off between bias and stability of the results. Lasso is the preferred method when in analyses where you want to adjust for many exposure variables, while the number of cases is limited (as in the current paper).

### *Lasso regression*

If fully penalized, there will be no effects at all; effect size is fixed at 1. In the current model, the analysis is repeated several times and the model decides what the best prediction validity is. Compared to other adjusted regression models, lasso may have bias, but reduces variability. It is therefore the most trustworthy estimate. Lasso estimates should be treated as significant predictors although they come without p values or CI intervals and should report the overall p-value for the fully adjusted HR. Values should be interpreted similar to traditional regression models. Lasso results will be the main results in the paper and the ones that should be reported in the abstract. It also should be presented alongside crude and adjusted traditional regression results to provide the full picture. Variance may explain discordance between fully adjusted HR and Lasso.



**Table S1**, Risk factors for all-type pulmonary tuberculosis in Dale, Ethiopia, 2016–2017

| Covariates                    |                 | N    | TB  | Crude HR<br>(95% CI) | p                  | Adjusted HR<br>(95% CI) | p                  | Lasso<br>HR |
|-------------------------------|-----------------|------|-----|----------------------|--------------------|-------------------------|--------------------|-------------|
|                               |                 | 3484 | 180 |                      |                    |                         |                    |             |
| <i>Socio-demographic</i>      |                 |      |     |                      |                    |                         |                    |             |
| Age-groups (years)            |                 | 3484 | 180 |                      | 0.001 <sub>q</sub> |                         | 0.001 <sub>q</sub> |             |
|                               | 15 to 34 years  | 1238 | 108 | 1                    |                    | 1                       |                    |             |
|                               | 35 to 64 years  | 1945 | 65  | 0.37 (0.27, 0.50)    | 0.001              | 0.34 (0.24, 0.48)       | 0.001              | 0.46        |
|                               | 65+ years       | 301  | 7   | 0.24 (0.11, 0.52)    | 0.001              | 0.19 (0.09, 0.42)       | 0.001              | 0.39        |
| Sex                           |                 |      |     |                      |                    |                         |                    |             |
|                               | Female          | 2039 | 82  | 1                    |                    | 1                       |                    |             |
|                               | Male            | 1445 | 98  | 1.72 (1.28, 2.30)    | 0.001              | 2.09 (1.50, 2.92)       | 0.001              | 1.63        |
| Catchment area                |                 |      |     |                      | 0.001 <sub>q</sub> |                         | 0.001 <sub>q</sub> |             |
|                               | Semen Mesenkala | 416  | 29  | 1                    |                    | 1                       |                    |             |
|                               | Magara          | 220  | 12  | 0.83 (0.43, 1.63)    | 0.597              | 1.06 (0.53, 2.13)       | 0.866              |             |
|                               | Hida Kaliti     | 77   | 9   | 1.63 (0.77, 3.44)    | 0.203              | 2.17 (0.96, 4.91)       | 0.062              | 1.37        |
|                               | Bera Tadicho    | 446  | 31  | 1.04 (0.63, 1.72)    | 0.884              | 2.62 (1.51, 4.55)       | 0.001              | 1.55        |
|                               | Goida           | 267  | 16  | 0.92 (0.50, 1.70)    | 0.791              | 1.77 (0.93, 3.37)       | 0.083              | 1.1         |
|                               | Boa Badagalo    | 675  | 25  | 0.56 (0.33, 0.95)    | 0.032              | 0.87 (0.50, 1.54)       | 0.643              | 0.88        |
|                               | Dagyia          | 380  | 5   | 0.21 (0.08, 0.54)    | 0.001              | 0.52 (0.20, 1.39)       | 0.193              | 0.7         |
|                               | Gidamo          | 201  | 11  | 0.74 (0.37, 1.49)    | 0.406              | 2.05 (0.98, 4.30)       | 0.057              | -           |
|                               | Moto            | 466  | 21  | 0.66 (0.38, 1.15)    | 0.144              | 1.02 (0.57, 1.83)       | 0.948              | -           |
|                               | Semen Kege      | 336  | 21  | 0.98 (0.56, 1.72)    | 0.939              | 1.77 (0.96, 3.26)       | 0.069              | 1.02        |
| Occupation                    |                 |      |     |                      | 0.039 <sub>q</sub> |                         | 0.363 <sub>q</sub> |             |
|                               | Farmer          | 2328 | 123 | 1                    |                    | 1                       |                    |             |
|                               | Housewife       | 883  | 34  | 0.76 (0.52, 1.11)    | 0.16               | 0.88 (0.57, 1.35)       | 0.557              | -           |
|                               | Merchant        | 70   | 3   | 0.79 (0.25, 2.48)    | 0.686              | 0.56 (0.17, 1.90)       | 0.354              | -           |
|                               | Student         | 169  | 18  | 2.04 (1.25, 3.35)    | 0.005              | 1.90 (1.08, 3.35)       | 0.027              | 1.42        |
|                               | GO              | 16   | 2   | 2.28 (0.56, 9.21)    | 0.248              | 2.21 (0.53, 9.26)       | 0.278              | 1.01        |
|                               | Daily labourer  | 10   | 0   | -                    | 0.993              | -                       | 0.995              | 0.92        |
|                               | Other           | 8    | 0   | -                    | 0.993              | -                       | 0.996              | -           |
| Marital status                |                 |      |     |                      |                    |                         |                    |             |
|                               | Married         | 2801 | 132 | 1                    |                    | 1                       |                    |             |
|                               | Not-married     | 683  | 63  | 1.49 (1.07, 2.07)    | 0.019              | 0.87 (0.58, 1.30)       | 0.492              | -           |
| <i>n</i> of household members |                 | 3484 |     | 1.11 (1.00, 1.24)    | 0.06               | 1.10 (0.98, 1.23)       | 0.114              | 1.04        |
| Years completed               |                 | 3481 | 180 | 0.82 (0.78, 0.86)    | 0.001              | 0.77 (0.72, 0.82)       | 0.001              | 0.82        |
| <i>Clinical information</i>   |                 |      |     |                      |                    |                         |                    |             |
| BMI ≥ 18.5 kg/m <sup>2</sup>  |                 | 1396 | 57  | 1                    |                    | 1                       |                    |             |
| BMI < 18.5 kg/m <sup>2</sup>  |                 | 2077 | 123 | 1.51 (1.10, 2.07)    | 0.01               | 1.29 (0.92, 1.79)       | 0.136              | 1.07        |

|                                 |                             |      |     |                   |       |                   |       |      |
|---------------------------------|-----------------------------|------|-----|-------------------|-------|-------------------|-------|------|
| MUAC in cm                      |                             | 3453 | 180 | 0.81 (0.76, 0.86) | 0.001 | 0.79 (0.74, 0.85) | 0.001 | 0.83 |
| <i>Risk factors</i>             |                             |      |     |                   |       |                   |       |      |
| Previous history of TB          |                             |      |     |                   |       |                   |       |      |
|                                 | no                          | 2945 | 150 |                   |       |                   |       |      |
|                                 | yes                         | 537  | 30  | 1.00 (0.67, 1.47) | 0.982 | 1.29 (0.81, 2.05) | 0.279 | -    |
| History of TB case in household |                             |      |     |                   |       |                   |       |      |
|                                 | no                          | 2977 | 153 |                   |       |                   |       |      |
|                                 | yes                         | 505  | 27  | 0.98 (0.65, 1.47) | 0.914 | 1.44 (0.86, 2.40) | 0.165 | 0.96 |
| Living with chronic cougher     |                             |      |     |                   |       |                   |       |      |
|                                 | no                          | 2539 | 150 | 1                 |       |                   |       |      |
|                                 | yes                         | 945  | 30  | 0.51 (0.34, 0.75) | 0.001 | 0.40 (0.25, 0.64) | 0.001 | 0.62 |
| HIV test                        |                             |      |     |                   |       |                   |       |      |
|                                 | No                          | 2754 | 131 | 1                 |       |                   |       |      |
|                                 | yes                         | 729  | 49  | 1.42 (1.02, 1.97) | 0.037 | 1.85 (1.31, 2.60) | 0.001 | 1.39 |
| Ever drink alcohol              |                             |      |     |                   |       |                   |       |      |
|                                 | no                          | 3295 | 173 |                   |       |                   |       |      |
|                                 | yes                         | 189  | 7   | 0.66 (0.31, 1.41) | 0.288 | 0.62 (0.24, 1.58) | 0.315 | 0.86 |
| Ever chew chat                  |                             |      |     |                   |       |                   |       |      |
|                                 | No                          | 3268 | 172 | 1                 |       | 1                 |       |      |
|                                 | yes                         | 216  | 8   | 0.67 (0.33, 1.36) | 0.263 | 0.73 (0.27, 1.99) | 0.544 | 96   |
| Ever smoke                      |                             |      |     |                   |       |                   |       |      |
|                                 | No                          | 3355 | 175 | 1                 |       | 1                 |       |      |
|                                 | yes                         | 129  | 5   | 0.72 (0.29, 1.74) | 0.461 | 0.80 (0.23, 2.85) | 0.736 | 0.99 |
| Currently smoking               |                             |      |     |                   |       |                   |       |      |
|                                 | no                          | 3235 | 173 |                   |       |                   |       |      |
|                                 | yes                         | 247  | 7   | 0.52 (0.24, 1.11) | 0.089 | 0.70 (0.26, 1.91) | 0.484 | 0.83 |
| Previously smoke smoker         |                             |      |     |                   |       |                   |       |      |
|                                 | No                          | 3183 | 167 |                   |       |                   |       |      |
|                                 | Yes                         | 299  | 12  | 0.75 (0.42, 1.35) | 0.344 | 0.91 (0.42, 1.96) | 0.808 | -    |
| <i>Economic indicators</i>      |                             |      |     |                   |       |                   |       |      |
| Number of rooms                 |                             | 3484 |     | 0.85 (0.71, 1.02) | 0.074 | 0.98 (0.79, 1.20) | 0.814 |      |
| Wall type                       |                             |      |     |                   |       |                   |       |      |
|                                 | Wood only /other            | 1839 | 121 | 1                 |       | 1                 |       |      |
|                                 | Wood with/mud/brick /cement | 1645 | 59  | 0.52(0.38, 0.71)  | 0     | 0.68 (0.47, 0.97) | 0.035 | 0.73 |
| Roof type                       |                             |      |     |                   |       |                   |       |      |
|                                 | Leaf/tached/other           | 1222 | 37  | 1                 |       |                   |       |      |

|                    |                 |      |     |                   |       |                   |       |       |
|--------------------|-----------------|------|-----|-------------------|-------|-------------------|-------|-------|
|                    | Corrugated iron | 2262 | 143 | 0.45 (0.32, 0.65) | 0.001 | 0.70 (0.45, 1.11) | 0.128 | 0.86  |
| Electricity access |                 |      |     |                   |       |                   |       |       |
|                    | No              | 2864 | 151 | 1                 |       |                   |       |       |
|                    | Yes             | 620  | 29  | 0.89 (0.60, 1.33) | 0.57  | 1.34 (0.86, 2.10) | 0.192 | -     |
| Fuel for cooking   |                 |      |     |                   |       |                   |       |       |
|                    | Other           | 3457 | 180 |                   |       |                   |       |       |
|                    | Electricity     | 27   | 0   | 0                 |       | 0.992             |       | 0.993 |
| Separate kitchen   |                 |      |     |                   |       |                   |       |       |
|                    | No              | 2746 | 166 | 1                 |       |                   | 1     |       |
|                    | yes             | 738  | 14  | 0.30 (0.17, 0.51) | 0.001 | 0.70 (0.45, 1.11) | 0.128 | 0.63  |
| Ventilation        |                 |      |     |                   |       |                   |       |       |
|                    | No              | 3098 | 165 |                   |       |                   |       |       |
|                    | yes             | 386  | 15  | 0.30 (0.17, 0.51) | 0.001 | 0.70 (0.45, 1.11) | 0.128 | 0.63  |
| Heating            |                 |      |     |                   |       |                   |       |       |
|                    | No              | 3394 | 179 |                   |       |                   |       |       |
|                    | Yes             | 90   | 1   | 0.22 (0.03, 1.56) | 0.129 | 0.21 (0.03, 1.64) | 0.137 | 0.88  |
| Bank account       |                 |      |     |                   |       |                   |       |       |
|                    | No              | 3350 | 176 |                   |       |                   |       |       |
|                    | Yes             | 133  | 3   | 0.40 (0.13, 1.25) | 0.116 | 0.53 (0.12, 2.22) | 0.382 | -     |
| Land agriculture   |                 |      |     |                   |       |                   |       |       |
|                    | No              | 444  | 36  |                   |       |                   |       |       |
|                    | Yes             | 3040 | 144 | 0.54 (0.37, 0.78) | 0.001 | 0.80 (0.53, 1.19) | 0.27  | 0.87  |
| Mobile             |                 |      |     |                   |       |                   |       |       |
|                    | No              | 2862 | 150 |                   |       |                   |       |       |
|                    | Yes             | 622  | 30  | 0.85 (0.58, 1.26) | 0.429 | 0.93 (0.60, 1.43) | 0.738 | -     |
| TV                 |                 |      |     |                   |       |                   |       |       |
|                    | No              | 3415 | 178 |                   |       |                   |       |       |
|                    | Yes             | 69   | 2   | 0.55 (0.14, 2.22) | 0.403 | 1.03 (0.17, 6.11) | 0.972 | -     |
| Radio              |                 |      |     |                   |       |                   |       |       |
|                    | No              | 2995 | 160 |                   |       |                   |       |       |
|                    | Yes             | 489  | 20  | 0.71 (0.45, 1.13) | 0.152 | 1.08 (0.64, 1.84) | 0.769 | -     |
| Refrigerator       |                 |      |     |                   |       |                   |       |       |
|                    | No              | 3450 | 178 |                   |       |                   |       |       |
|                    | Yes             | 34   | 2   | 1.15(0.28,4.63)   | 0.848 | 2.52 (0.42,15.03) | 0.309 | -     |

TB, tuberculosis; HR, hazard ratio; CI, confidence interval; GO, government employee; BMI, body mass index; MUAC, middle-upper arm circumference; TV, television; *n*=number

<sup>q</sup>*p* value for the variable as a whole for variables with more than one value.

**Table S2**, Comparison of current versus previous study in six kebeles included in the current study 5-years earlier.

| Categories                                                    | Six kebeles |          |         |
|---------------------------------------------------------------|-------------|----------|---------|
|                                                               | Current     | Previous | Reduced |
| Number of kebeles                                             | 6           | 6        |         |
| Population $\geq 14$ years previous / $\geq 15$ years current | 24117       | 21774    |         |
| Persistent coughers                                           | 273         | 724      | 2.7     |
| Smear positive TB cases diagnosed                             | 5           | 23       | 4.6     |
| Observation years                                             | 333         | 588      | 1.8     |
| TB per 100 000 observation years                              | 1502        | 3912     | 2.6     |
